# Supplementary material for: Two Methods, One Goal: Structural Differences between Cocrystallization and Crystal Soaking to Discover Ligand Binding Poses
Source: PubMed Central journal article supplement — ChemMedChem. 2020 Oct 30;16(1):292–300. doi: 10.1002/cmdc.202000565 (PMC7821316; doi:10.1002/cmdc.202000565), 2020-10-30
Supplement: CMDC-16-292-s001.pdf [file CMDC-16-292-s001.pdf]

# ChemMedChem

Supporting Information

## **Two Methods, One Goal: Structural Differences between Cocrystallization and Crystal Soaking to Discover Ligand Binding Poses**

Barbara Wiene-Schmidt, Matthias Oebbeke, Khang Ngo, Andreas Heine, and Gerhard Klebe\*

## Table of Contents

|                                                                  |    |
|------------------------------------------------------------------|----|
| Table of Contents .....                                          | S1 |
| 1. Crystallographic Tables.....                                  | S2 |
| 2. Comparison of Ligands and Electron Density Maps .....         | S5 |
| 3. RMSD Calculations .....                                       | S5 |
| 4. Luzzati Plot.....                                             | S6 |
| 5. Soaking protocol to obtain trypsin crystals of <b>9</b> ..... | S6 |
| 6. References.....                                               | S6 |

## 1. Crystallographic Tables

**Table S1.** Crystallographic table for crystal structures obtained by soaking for ligands **1-3** and **9**.

| Ligand (PDB code)                                        | 9 (6QL0)                  | 1 (6YNA)                                           | 2 (6YNT)                                           | 3 (6YQK)                                           |
|----------------------------------------------------------|---------------------------|----------------------------------------------------|----------------------------------------------------|----------------------------------------------------|
| Soaked / cocrystallized                                  | soaked                    | soaked                                             | soaked                                             | soaked                                             |
| <b>Data Collection and Processing</b>                    |                           |                                                    |                                                    |                                                    |
| Wavelength (Å)                                           | 0.918409                  | 0.918409                                           | 0.918409                                           | 0.918409                                           |
| Beamline                                                 | BESSY, 14.1               | BESSY, 14.1                                        | BESSY, 14.1                                        | BESSY, 14.1                                        |
| Detector                                                 | PILATUS 6M                | PILATUS 6M                                         | PILATUS 6M                                         | PILATUS 6M                                         |
| Space group                                              | P3 <sub>1</sub> 21 (152)  | P2 <sub>1</sub> 2 <sub>1</sub> 2 <sub>1</sub> (19) | P2 <sub>1</sub> 2 <sub>1</sub> 2 <sub>1</sub> (19) | P2 <sub>1</sub> 2 <sub>1</sub> 2 <sub>1</sub> (19) |
| Unit cell parameters:                                    |                           |                                                    |                                                    |                                                    |
| a, b, c (Å)                                              | 54.7, 54.7, 106.3         | 58.2, 72.5, 108.9                                  | 72.5, 74.5, 80.4                                   | 58.2, 73.2, 108.5                                  |
| α, β, γ (°)                                              | 90.0, 90.0, 120.0         | 90, 90, 90                                         | 90, 90, 90                                         | 90, 90, 90                                         |
| Matthews coefficient (Å <sup>3</sup> /Da) <sup>a</sup>   | 1.9                       | 2.8                                                | 2.64                                               | 2.82                                               |
| Solvent content (%) <sup>a</sup>                         | 36                        | 56.1                                               | 53.5                                               | 56.3                                               |
| <b>Diffraction Data<sup>b</sup></b>                      |                           |                                                    |                                                    |                                                    |
| Resolution range (Å)                                     | 47.34-1.63<br>(1.73-1.63) | 45.45-1.47<br>(1.56-1.47)                          | 43.63-1.52<br>(1.61-1.52)                          | 45.46-1.67<br>(1.77-1.67)                          |
| Unique reflections                                       | 23253 (3510)              | 79455 (12522)                                      | 67316 (10749)                                      | 53731 (8549)                                       |
| Redundancy                                               | 7.6 (7.8)                 | 6.7                                                | 4.4                                                | 5.5                                                |
| <i>R</i> ( <i>I</i> ) <sub>sym</sub> (%)                 | 17.3 (50.4)               | 3.5 (47.8)                                         | 4.4 (44.0)                                         | 6.8 (49.0)                                         |
| Completeness (%)                                         | 99.0 (94.3)               | 99.7 (98.4)                                        | 99.5 (99.6)                                        | 98.2 (98.1)                                        |
| < <i>I</i> /σ( <i>I</i> )>                               | 7.2 (2.5)                 | 27.6 (3.8)                                         | 17.1 (3.0)                                         | 14.3 (2.8)                                         |
| <b>Refinement</b>                                        |                           |                                                    |                                                    |                                                    |
| Resolution range (Å)                                     | 47.34-1.63                | 45.45-1.47                                         | 43.63-1.52                                         | 43.58-1.67                                         |
| Reflections (work/free)                                  | 22090 / 1163              | 75482/3973                                         | 63950/3366                                         | 51044/2687                                         |
| Final <i>R</i> value for all reflections (work/free) (%) | 15.8 / 19.5               | 16.3/18.9                                          | 16.9/19.1                                          | 16.5/20.2                                          |
| Protein/peptide residues                                 | 223                       | 353/13                                             | 346/19                                             | 346/13                                             |
| Calcium atoms                                            | 1                         | 0                                                  | 0                                                  | 0                                                  |
| Inhibitor atoms                                          | 27                        | 20                                                 | 21                                                 | 21                                                 |
| Water molecules                                          | 165                       | 306                                                | 276                                                | 240                                                |
| RMSD from ideality:                                      |                           |                                                    |                                                    |                                                    |
| Bond lengths (Å)                                         | 0.007                     | 0.005                                              | 0.008                                              | 0.009                                              |
| Bond angles (°)                                          | 0.9                       | 0.8                                                | 1.0                                                | 1.0                                                |
| Ramachandran plot (%) <sup>c</sup> :                     |                           |                                                    |                                                    |                                                    |
| Most favored regions                                     | 87.2                      | 93.3                                               | 91.3                                               | 91.9                                               |
| Additionally allowed regions                             | 12.8                      | 6.7                                                | 8.7                                                | 8.1                                                |
| Generously allowed regions                               | 0.0                       | 0.0                                                | 0.0                                                | 0.0                                                |
| Disallowed regions                                       | 0.0                       | 0.0                                                | 0.0                                                | 0.0                                                |
| Mean <i>B</i> factors (Å <sup>2</sup> ) <sup>d</sup> :   |                           |                                                    |                                                    |                                                    |
| Protein                                                  | 17.4                      | 27.2                                               | 26.4                                               | 28.7                                               |
| Peptide                                                  |                           | 27.1                                               | 24.1                                               | 31.4                                               |
| Ligand                                                   | 10.9                      | 26.6                                               | 30.4                                               | 23.0                                               |
| Water molecules                                          | 23.6                      | 34.9                                               | 33.1                                               | 32.9                                               |

<sup>a</sup>Values calculated from Ruppweb<sup>[1]</sup>

<sup>b</sup>Values in parenthesis refer to the highest resolution shell

<sup>c</sup>Calculated using PROCHECK<sup>[2]</sup>

<sup>d</sup>Calculated using MOLEMAN excluding hydrogen atoms<sup>[3,3,4]</sup>

**Table S2.** Crystallographic table for crystal structures obtained by soaking for ligands 4-7.

| Ligand (PDB code)<br>Soaked / cocrystallized           | 4 (6YQJ)<br>soaked                                 | 5 (6YQI)<br>soaked                                 | 6 (6YNB)<br>soaked                                 | 7 (6YNC)<br>soaked                                 |
|--------------------------------------------------------|----------------------------------------------------|----------------------------------------------------|----------------------------------------------------|----------------------------------------------------|
| <b>Data Collection and Processing</b>                  |                                                    |                                                    |                                                    |                                                    |
| Wavelength (Å)                                         | 0.918409                                           | 0.918409                                           | 0.918409                                           | 0.918409                                           |
| Beamline                                               | BESSY, 14.1                                        | BESSY, 14.1                                        | BESSY, 14.1                                        | BESSY, 14.1                                        |
| Detector                                               | PILATUS 6M                                         | PILATUS 6M                                         | PILATUS 6M                                         | PILATUS 6M                                         |
| Space group                                            | P2 <sub>1</sub> 2 <sub>1</sub> 2 <sub>1</sub> (19) |
| Unit cell parameters:                                  |                                                    |                                                    |                                                    |                                                    |
| a, b, c (Å)                                            | 58.2, 72.5, 109.2                                  | 58.1, 72.5, 108.7                                  | 58.3, 72.0, 109.8                                  | 58.3, 73.1, 109.3                                  |
| α, β, γ (°)                                            | 90, 90, 90                                         | 90, 90, 90                                         | 90, 90, 90                                         | 90, 90, 90                                         |
| Matthews coefficient (Å <sup>3</sup> /Da) <sup>a</sup> | 2.8                                                | 2.8                                                | 2.8                                                | 2.8                                                |
| Solvent content (%) <sup>a</sup>                       | 56.2                                               | 55.9                                               | 56.2                                               | 56.1                                               |
| <b>Diffraction Data<sup>b</sup></b>                    |                                                    |                                                    |                                                    |                                                    |
| Resolution range (Å)                                   | 45.46-1.58<br>(1.67-1.58)                          | 45.34-1.42<br>(1.50-1.42)                          | 43.47-1.72<br>(1.82-1.72)                          | 45.58-1.40<br>(1.48-1.40)                          |
| Unique reflections                                     | 62707 (8401)                                       | 86529 (13515)                                      | 49381 (7745)                                       | 91422 (13988)                                      |
| Redundancy                                             | 5.2                                                | 6.7                                                | 5.4                                                | 6.7                                                |
| R( <i>I</i> ) <sub>sym</sub> (%)                       | 5.6 (49.5)                                         | 3.8 (46.2)                                         | 5.1 (49.6)                                         | 4.9 (46.7)                                         |
| Completeness (%)                                       | 96.6 (81.1)                                        | 98.5 (96.4)                                        | 99.3 (97.5)                                        | 97.9 (93.7)                                        |
| <I/σ(I)>                                               | 15.67 (2.4)                                        | 22.72 (3.1)                                        | 20.02 (2.9)                                        | 19.01 (3.0)                                        |
| <b>Refinement</b>                                      |                                                    |                                                    |                                                    |                                                    |
| Resolution range (Å)                                   | 45.46-1.58                                         | 45.34-1.42                                         | 41.81-1.72                                         | 45.58-1.40                                         |
| Reflections (work/free)                                | 59571/3136                                         | 82202/4327                                         | 46912/2469                                         | 86850/4572                                         |
| Final R value for all reflections (work/free) (%)      | 15.8/20.1                                          | 15.4/18.0                                          | 15.6/20.1                                          | 14.9/17.3                                          |
| Protein/peptide residues                               | 350/13                                             | 347/13                                             | 349/13                                             | 350/14                                             |
| Inhibitor atoms                                        | 20                                                 | 20                                                 | 17                                                 | 15                                                 |
| Water molecules                                        | 342                                                | 296                                                | 249                                                | 372                                                |
| RMSD from ideality:                                    |                                                    |                                                    |                                                    |                                                    |
| Bond lengths (Å)                                       | 0.008                                              | 0.007                                              | 0.009                                              | 0.007                                              |
| Bond angles (°)                                        | 1.0                                                | 0.9                                                | 1.0                                                | 1.0                                                |
| Ramachandran plot (%) <sup>c</sup> :                   |                                                    |                                                    |                                                    |                                                    |
| Most favored regions                                   | 93.2                                               | 93.5                                               | 92.2                                               | 92.6                                               |
| Additionally allowed regions                           | 6.8                                                | 6.2                                                | 7.8                                                | 7.1                                                |
| Generously allowed regions                             | 0.0                                                | 0.3                                                | 0.0                                                | 0.3                                                |
| Disallowed regions                                     | 0.0                                                | 0.0                                                | 0.0                                                | 0.0                                                |
| Mean B factors (Å <sup>2</sup> ) <sup>d</sup> :        |                                                    |                                                    |                                                    |                                                    |
| Protein                                                | 26.9                                               | 27.2                                               | 30.6                                               | 22.4                                               |
| Peptide                                                | 27.9                                               | 30.3                                               | 32.1                                               | 23.4                                               |
| Ligand                                                 | 27.8                                               | 27.7                                               | 38.4                                               | 18.8                                               |
| Water molecules                                        | 34.5                                               | 34.8                                               | 34.6                                               | 31.5                                               |

<sup>a</sup>Values calculated from Ruppweb<sup>[1]</sup><sup>b</sup>Values in parenthesis refer to the highest resolution shell<sup>c</sup>Calculated using PROCHECK<sup>[2]</sup><sup>d</sup>Calculated using MOLEMAN excluding hydrogen atoms<sup>[3,3,4]</sup>

**Table S3.** Crystallographic table for crystal structures obtained by co-crystallization for ligands **2** and **8** and by soaking for ligand **8**.

| Ligand (PDB code)<br>Soaked / cocrystallized             | <b>8</b> (6YNR)<br>soaked                          | <b>2</b> (6Y8C)<br>co-crystallized                 | <b>8</b> (6Y2O)<br>co-crystallized                 |
|----------------------------------------------------------|----------------------------------------------------|----------------------------------------------------|----------------------------------------------------|
| <b>Data Collection and Processing</b>                    |                                                    |                                                    |                                                    |
| Wavelength (Å)                                           | 0.918409                                           | 0.970000                                           | 0.918409                                           |
| Beamline                                                 | BESSY, 14.1                                        | ESRF, ID29                                         | BESSY, 14.1                                        |
| Detector                                                 | PILATUS 6M                                         | PILATUS 6M                                         | PILATUS 6M                                         |
| Space group                                              | P2 <sub>1</sub> 2 <sub>1</sub> 2 <sub>1</sub> (19) | P2 <sub>1</sub> 2 <sub>1</sub> 2 <sub>1</sub> (19) | P2 <sub>1</sub> 2 <sub>1</sub> 2 <sub>1</sub> (19) |
| Unit cell parameters:                                    |                                                    |                                                    |                                                    |
| a, b, c (Å)                                              | 72.4, 74.3, 80.2                                   | 58.7, 71.1, 108.0                                  | 58.6, 74.9, 106.0                                  |
| α, β, γ (°)                                              | 90, 90, 90                                         | 90, 90, 90                                         | 90, 90, 90                                         |
| Matthews coefficient (Å <sup>3</sup> /Da) <sup>a</sup>   | 2.6                                                | 2.8                                                | 2.8                                                |
| Solvent content (%) <sup>a</sup>                         | 53.3                                               | 55.2                                               | 56.7                                               |
| <b>Diffraction Data<sup>b</sup></b>                      |                                                    |                                                    |                                                    |
| Resolution range (Å)                                     | 43.54-1.90<br>(2.01-1.90)                          | 45.27-1.93<br>(2.04-1.93)                          | 46.18-2.01<br>(2.13-2.01)                          |
| Unique reflections                                       | 34602 (5482)                                       | 34803 (5493)                                       | 31850 (5005)                                       |
| Redundancy                                               | 4.4                                                | 7.4                                                | 5.9                                                |
| <i>R</i> ( <i>I</i> ) <sub>sym</sub> (%)                 | 5.6 (49.6)                                         | 10.2 (51.8)                                        | 5.4 (48.9)                                         |
| Completeness (%)                                         | 99.2 (98.4)                                        | 99.8 (99.0)                                        | 99.5 (98.4)                                        |
| <1/σ( <i>I</i> )>                                        | 18.8 (3.0)                                         | 10.9 (2.8)                                         | 19.9 (3.6)                                         |
| <b>Refinement</b>                                        |                                                    |                                                    |                                                    |
| Resolution range (Å)                                     | 43.54-1.90                                         | 45.27-1.93                                         | 46.18-2.01                                         |
| Reflections (work/free)                                  | 32867/1730                                         | 34798/1741                                         | 30254/1593                                         |
| Final <i>R</i> value for all reflections (work/free) (%) | 18.8/22.1                                          | 18.5/22.2                                          | 22.1/25.4                                          |
| Protein/peptide residues                                 | 341/19                                             | 353/18                                             | 353/18                                             |
| Inhibitor atoms                                          | 11                                                 | 21                                                 | 11                                                 |
| Water molecules                                          | 216                                                | 162                                                | 137                                                |
| RMSD from ideality:                                      |                                                    |                                                    |                                                    |
| Bond lengths (Å)                                         | 0.006                                              | 0.007                                              | 0.007                                              |
| Bond angles (°)                                          | 0.7                                                | 0.8                                                | 0.8                                                |
| Ramachandran plot (%) <sup>c</sup> :                     |                                                    |                                                    |                                                    |
| Most favored regions                                     | 92.1                                               | 92.4                                               | 92.4                                               |
| Additionally allowed regions                             | 7.6                                                | 7.6                                                | 7.6                                                |
| Generously allowed regions                               | 0.3                                                | 0.0                                                | 0.0                                                |
| Disallowed regions                                       | 0.0                                                | 0.0                                                | 0.0                                                |
| Mean <i>B</i> factors (Å <sup>2</sup> ) <sup>d</sup> :   |                                                    |                                                    |                                                    |
| Protein                                                  | 26.6                                               | 39.9                                               | 37.7                                               |
| Peptide                                                  | 24.2                                               | 35.7                                               | 37.9                                               |
| Ligand                                                   | 25.1                                               | 38.6                                               | 35.3                                               |
| Water molecules                                          | 30.8                                               | 41.9                                               | 38.5                                               |

<sup>a</sup>Values calculated from Ruppweb<sup>[1]</sup>

<sup>b</sup>Values in parenthesis refer to the highest resolution shell

<sup>c</sup>Calculated using PROCHECK<sup>[2]</sup>

<sup>d</sup>Calculated using MOLEMAN excluding hydrogen atoms<sup>[3,3,4]</sup>

All structures not mentioned above can be found in previous publications. This applies for the cocrystallized structures **1**<sup>[5]</sup>, **3**<sup>[6]</sup>, **4**<sup>[5]</sup> and **5**<sup>[5]</sup>, as well as for **6**<sup>[7]</sup> and **7**<sup>[7]</sup>. For the trypsin structure cocrystallized with ligand **9** the crystallographic table can be found in another publication.<sup>[8]</sup>

## 2. Comparison of Ligands and Electron Density Maps

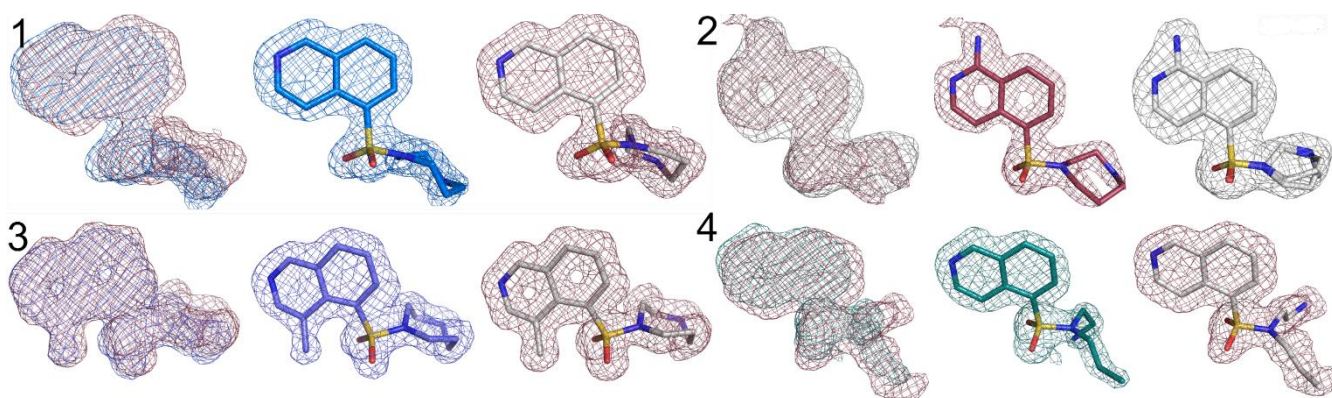

**Figure S1.** Comparison of the soaked (coloured) and cocrystallized (white) structures 1-4. The  $2F_o-F_c$  electron densities for the ligands are shown at a RMSD level of  $1.0\sigma$  except for ligand 2 ( $0.8\sigma$ ).

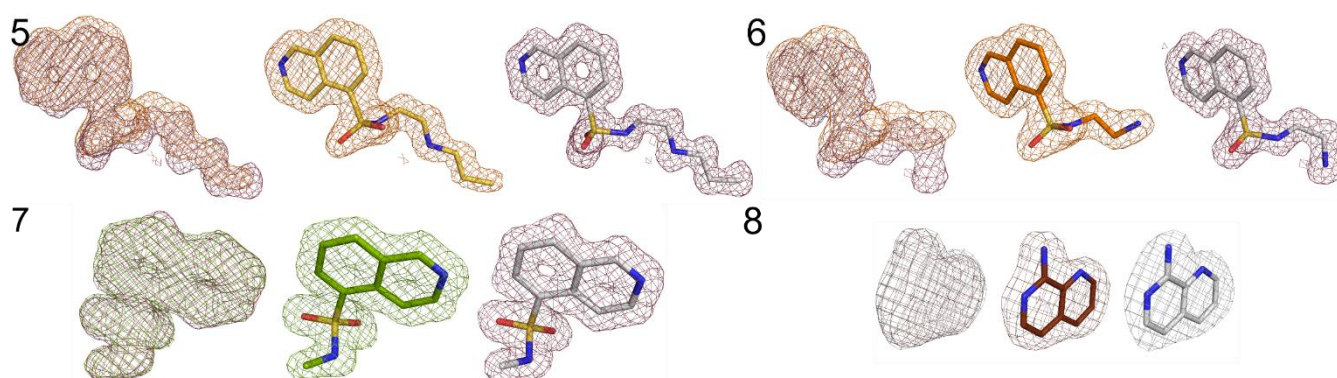

**Figure S2.** Comparison of the soaked (coloured) and cocrystallized (white) structures 5-8. The  $2F_o-F_c$  electron densities for the ligands are shown at a RMSD level of  $1.0\sigma$ .

## 3. RMSD Calculations

RMSD calculations were performed using ProFitV3.3<sup>[9]</sup> after fitting the structures with the implemented MCLACHLAN algorithm.<sup>[10]</sup>

**Table S4.** RMSD comparison of the cocrystal structures with structures obtained from soaking.

| Ligand ID     | RMSD $C_\alpha$ [Å] <sup>a)</sup> | RMSD $C_\alpha$ HINGE [Å] <sup>b)</sup> | RMSD Ligand [Å] <sup>c)</sup> | $\Delta$ RMSD (Ligand-HINGE) [Å] <sup>d)</sup> |
|---------------|-----------------------------------|-----------------------------------------|-------------------------------|------------------------------------------------|
| 1             | 1.0                               | 0.5                                     | 1.0                           | 0.5                                            |
| 2 (1. ligand) | 0.8                               | 0.4                                     | 0.7                           | 0.3                                            |
| 2 (2. ligand) | 0.8                               | 0.4                                     | 0.6                           | 0.2                                            |
| 3             | 0.7                               | 0.3                                     | 0.7                           | 0.4                                            |
| 4             | 1.0                               | 0.4                                     | 0.9                           | 0.5                                            |
| 5             | 0.7                               | 0.4                                     | 0.9                           | 0.5                                            |
| 6             | 0.7                               | 0.3                                     | 1.2                           | 0.9                                            |
| 7             | 0.5                               | 0.2                                     | 0.2                           | 0.0                                            |
| 8             | 0.4                               | 0.2                                     | 0.1                           | 0.1                                            |

a) RMSD of the fitted  $C_\alpha$  atoms based on the fit described in the experimental section

b) RMSD of the  $C_\alpha$  atoms 120-123 based on the fit described in the experimental section

c) RMSD of the ligand atoms based on the fit described in the experimental section

d) RMSD difference  $C_\alpha$  atoms hinge atoms (b)) and ligand atoms (c))

**Table S5.** RMSD comparison of all structures using two sets of reference coordinates, one for the cocrystal structures and one for the soaked structures.

| Ligand ID | Cocrystallization                     | Soaking                               |
|-----------|---------------------------------------|---------------------------------------|
|           | RMSD C <sub>α</sub> [Å] <sup>a)</sup> | RMSD C <sub>α</sub> [Å] <sup>a)</sup> |
| 1         | 0.5                                   | 0.2                                   |
| 2         | 0.4                                   | 0.3                                   |
| 3         | 0.5                                   | 0.4                                   |
| 4         | 0.5                                   | 0.2                                   |
| 5         | 0.3                                   | 0.2                                   |
| 6         | 0.3                                   | 0.2                                   |
| 7         | 0.5                                   | 0.2                                   |
| 8         | 0.5                                   | 0.3                                   |

<sup>a)</sup> The coordinate set was generated using the *MULTREF* command in ProFitV3.3<sup>[9]</sup> to obtain a mean reference structure to which the overall deviations of the ligand atoms are related. Larger values are computed for the cocrystallized compared to soaked structures.

#### 4. Luzzati Plot

A Luzzati Plot was created and evaluated using the *sfcheck* program from CCP4 to assess the reliability of the crystal structures. The crystal structure with the highest, the lowest and another structure were evaluated (see Table S6). Nevertheless this error does not estimate the final coordinate errors as described by CRUICKSHANK et al..<sup>[11]</sup>

**Table S6.** Value of atomic coordinate error by Luzzati Plot listed with the resolution of the crystal structure.

| Ligand ID           | Resolution [Å] | error by Luzzati Plot |
|---------------------|----------------|-----------------------|
| 3 (co-crystallized) | 1.37           | 0.2                   |
| 2 (soaked)          | 1.52           | 0.2                   |
| 8 (co-crystallized) | 2.01           | 0.3                   |

#### 5. Soaking protocol to obtain trypsin crystals of 9

The hanging-drop vapor diffusion method was applied to grow trigonal trypsin crystals at 18°C. For the trypsin-solution a HEPES buffer 15 mM (pH 7.0) with CaCl<sub>2</sub> 7.5 mM at a protein concentration of 45 mg mL<sup>-1</sup> was used. To 1 μL of this solution 1 μL of reservoir buffer was added on a cover slide. The reservoir solution consisted of 0.1 M (NH<sub>4</sub>)<sub>2</sub>SO<sub>4</sub>, HEPES 0.1 M (pH 7.5), 25% (w/v) ethylene glycol and 15% (w/v) PEG8000. After seven days of growing well diffracting crystals were obtained, which were also suitable for soaking. Therefore the reservoir buffer was combined with 10% glycerol and 10% ligand solution (1 M in DMSO). At 18°C the crystals were soaked for 5 minutes and flash-frozen in liquid nitrogen.

Data collection, data reduction and structural refinement were performed similar to the protocol described in reference 25 of the main manuscript.

#### 6. References

- [1] Bernhard Rupp, "Matthews Probability Calculator", can be found under <http://www.ruppweb.org/mattprob/default.html>, **2018**.
- [2] R. A. Laskowski, M. W. MacArthur, D. S. Moss, J. M. Thornton, *J Appl Crystallography* **1993**, *26*, 283.
- [3] G. J. Kleywegt, J.-Y. Zou, M. Kjeldgaard, T. A. Jones in *International Tables for Crystallography* (Ed.: H. Fuess), Springer Netherlands, Amsterdam, **2006**, pp. 353–356.
- [4] G. J. Kleywegt, "MOLEMAN. Unpublished Program; Uppsala University: Uppsala, Sweden".
- [5] B. Wiene-Schmidt, H. R. A. Jonker, T. Wulsdorf, H.-D. Gerber, K. Saxena, D. Kudlinzki, S. Sreeramulu, G. Parigi, C. Luchinat, A. Heine et al., *Journal of medicinal chemistry* **2018**, *61*, 5922.

- [6] B. Wienen-Schmidt, D. Schmidt, H.-D. Gerber, A. Heine, H. Gohlke, G. Klebe, *ACS chemical biology* **2019**, *14*, 2585.
- [7] B. Wienen-Schmidt, T. Wulsdorf, H. R. A. Jonker, K. Saxena, D. Kudlinzki, V. Linhard, S. Sreeramulu, A. Heine, H. Schwalbe, G. Klebe, *ChemMedChem* **2018**, *13*, 1988.
- [8] K. Ngo, C. Collins-Kautz, S. Gerstenecker, B. Wagner, A. Heine, G. Klebe, *Journal of medicinal chemistry* **2020**, *63*, 3274.
- [9] C. P. A.C.R. Martin, "ProFitV3.3", can be found under <http://www.bioinf.org.uk/software/profit/>.
- [10] A. D. McLachlan, *Acta Cryst. A* **1982**, *38*, 871.
- [11] D.W.J Cruickshank, *Acta Cryst. A* **1996**, *52*, C85.
